# Supplementary material for: Fibulin 2 Is Hypermethylated and Suppresses Tumor Cell Proliferation through Inhibition of Cell Adhesion and Extracellular Matrix Genes in Non-Small Cell Lung Cancer
Source: MDPI journal article supplement (doi:10.3390/ijms222111834), 2021-10-31
Supplement: s1 [file s1]

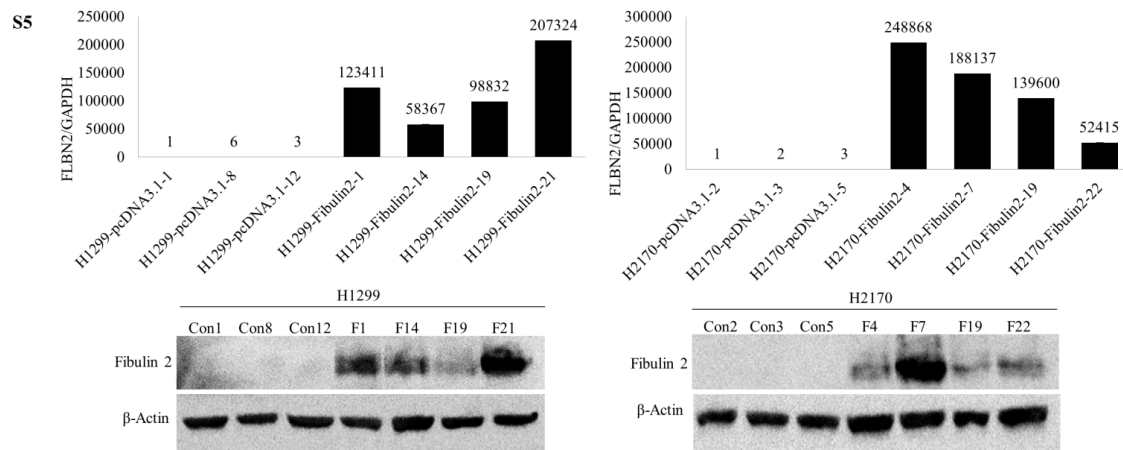

Figure S5. mRNA and protein expression of FBLN2 after stable transfection with the FBLN2 expression vector.

**S6**

| Cell adhesion molecules            | ECM associated genes           |
|------------------------------------|--------------------------------|
| Tight junction: JAM1, ZO1/2        | Fibronectin, Vimentin, Elastin |
| Adherent junction: CDH1-3          | Keratin                        |
| Desmosome: DSP, DSG2, DSC3, PKG    | COL1A1, COL3A1, COL4A1         |
| Gap junction: CX26, CX26           | MMPs (MMP2, 7, 9, 14)          |
| Hemidesmosome: ITGB4, ITGB1, ITGA6 | TIMP1/2 (MMPs inhibitor)       |

Figure S6. Selected panel of cell adhesion molecules and ECM-associated genes for the expression analysis.

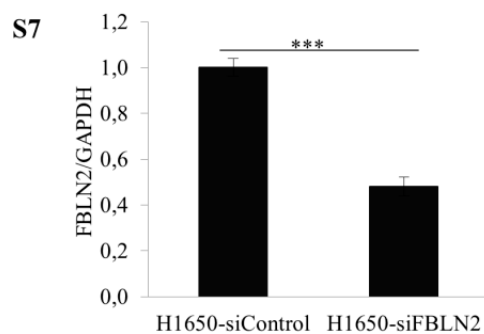

Figure S7. mRNA expression of FBLN2 after siRNA transient transfection in H1650 cells, mRNA expression level compared to GAPDH in cells transfected with siRNA-Control was set to 1.0. \*\*\*  $p < 0.001$ .

**S8**

|    | miRNA Name  | Cat. No. (Qiagen) |
|----|-------------|-------------------|
| 1  | miR-29a-3p  | YP00204698        |
| 2  | miR-29b-3p  | YP00204679        |
| 3  | miR-1-3p    | YP00204344        |
| 4  | miR-19a-3p  | YP00205862        |
| 5  | miR-199a-5p | YP00204494        |
| 6  | miR-9-3p    | YP00204620        |
| 7  | miR-200b-3p | YP00206071        |
| 8  | miR-155-5p  | YP00204308        |
| 9  | miR-125b-5p | YP00205713        |
| 10 | U6 snRNA    | YP00203907        |

Figure S8. The list of miRNAs analyzed in this study.

**S9**

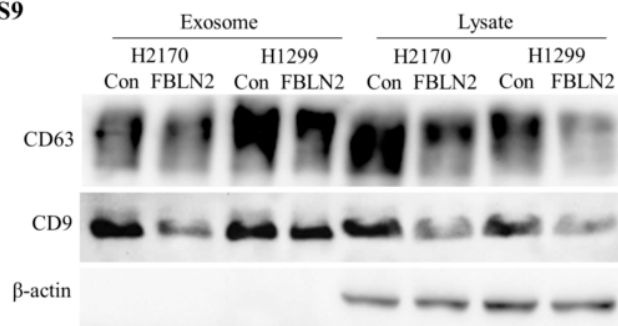

Figure S9. Western blotting of exosome markers CD63 and CD9 in both cell lysates and isolated exosomes of H2170 and H1299 cells.  $\beta$ -actin was used as loading control for proteins isolated from the cell lysates.

S10

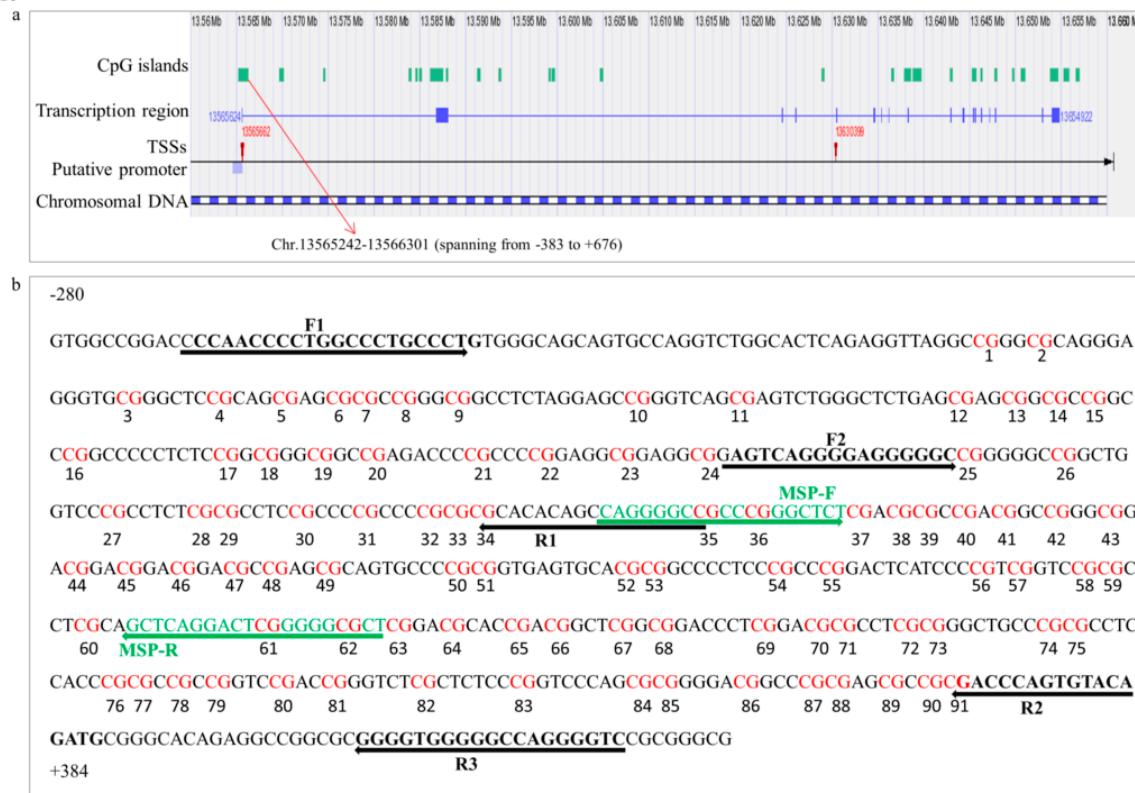

Figure S10. (a) Schematic profile of the FBLN2 CpG islands (<http://dbcat.cgm.ntu.edu.tw/>). (b) Primers used for BS (black underlined) and MSP (green underlined) are indicated within the CpG island spanning from -280 to +384 bp (Chr.: 13565409-13566075).
