# Supplementary material for: Fibulin 2 Is Hypermethylated and Suppresses Tumor Cell Proliferation through Inhibition of Cell Adhesion and Extracellular Matrix Genes in Non-Small Cell Lung Cancer
Source: Int J Mol Sci. 2021 Oct 31;22(21):11834. doi: 10.3390/ijms222111834 (PMC8584407; doi:10.3390/ijms222111834)
Supplement: Supplementary file 1 [file ijms-22-11834-s001.zip]

Archive with 5 entries (5 files):
- ijms-1423486 supplementary figures.pdf
- Supplementary figure 1-7.tif
- Supplementary figure 8-10.tif
- Supplementary Table 1.xlsx
- Supplementary Table 2.xlsx
