# Supplementary material for: Fibulin 2 Is Hypermethylated and Suppresses Tumor Cell Proliferation through Inhibition of Cell Adhesion and Extracellular Matrix Genes in Non-Small Cell Lung Cancer
Source: Int J Mol Sci. 2021 Oct 31;22(21):11834. doi: 10.3390/ijms222111834 (PMC8584407; doi:10.3390/ijms222111834)
Supplement: Supplementary file 1 [file ijms-22-11834-s001.zip › Supplementary Table 1.xlsx]

## Sheet: Suppementary Table 1
Supplementary Table 1. Sequences of primers
PCR	Primer name	Sequence (5'-3')	Anealing temperature
BS/MSP primer
	FBLN2-BS-F1	5′-TTAATTTTTGGTTTTGTTTTG-3′	50
	FBLN2-BS-R1	5′-ACCCCTAACTATATAC-3′
	FBLN2-BS-F2	5′-AGTTAGGGGAGGGGGT-3′	48
	FBLN2-BS-R2	5′-CACATCTATACTCTAAATC-3′
	FBLN2-BS-R3	5'-5-AACCCCTAACCCCCACCCC-3'
	FBLN2-UM-F	5′-TTAGGGGTTGTTTGGGTTTT3′	62
	FBLN2-UM-R	5′-AACACCCCCAAATCCTAAAC3′
	FBLN2-M-F	5′-TTAGGGGTCGTTCGGGTTTT3′	64
	FBLN2-M-R	5′-AACGCCCCCCGAATCCTAAAC3′
PCR
	FBLN2-ORF-F	5′-CCCAAGCTTGGGATGGTGCTGCTCTGGGAGCC-3′	55
	FBLN2-ORF-R	5′-CCGGAATTCCGGCAGGGCAAAGGTGGTGAAGAA-3′
Reverse transcription PCR (RT-PCR)
	FBLN2-LS-F	5′-GCTCAGCCATATGCTCCTGT-3′	56
	FBLN2-LS-R	5′-TGAGTGCCTTGTAGCAGTGG-3′
Real-time RT-PCR
	FBLN2-F	5′-TCGACGAGTGTGCTCAAG-3′	60
	FBLN2-R	5′-TAGTTGGGAGGACACTCGAAG-3′
	GAPDH-F	5′-GACAGTCAGCCGCATCTTCT-3′	60
	GAPDH-R	5′-TTAAAAGCAGCCCTGGTGAC-3′
	CDH1-F	5′-TTCCCAACTCCTCTCCTG-3′	60
	CDH1-R	5′-AAACCTTGCCTTCTTTGTC-3′
	CDH2-F	5′-ATTGGACCATCACTCGGCTTA-3′	60
	CDH2-R	5′-CACACTGGCAAACCTTCACG-3′
	CDH3-F	5'-TGACCACAAGCCCAAGTTTAC-3'	60
	CDH3-R	5'-TAAGCAACCACCCCATTGTAG-3'
	JAM1-F	5'-CGAGAGGAAACTGTTGTGCC-3'	60
	JAM1-R	5'-AACGAGTCTGGTGGTGTCTC-3'
	ZO1-F	5′-CCTTACTCACCACAAGCGCA-3′	60
	ZO1-R	5′-GCGAAAGGTAAGGGACTGGA-3′
	ZO2-F	5'-TAGCAGCGATCAACTTAGG-3'	60
	ZO2-R	5'-AGGAGTTTCATTACCAGCAA-3'
	DSP-F	5′-GCTTGCCAACTTCAGAGGTTCT-3′	60
	DSP-R	5′-TTGGAGAATAGCCTGGAGCAGT-3′
	DSG2-F	5’-ACAGGTTACGCTTTGGATGC-3’	60
	DSG2-R	5’-TTCAGGGTATTGGGCTCATC-3’
	PKG-F	5’-CCAACTCCCTCTTCAAGCATGA-3′	60
	PKG-R	5’-CCATCCATGTCCATGTGCATCG-3′
	DSC3-F	5’-AGTCGTGCTGGTGAAGCCTGC-3′	60
	DSC3-R	5’-AGACAGCGCAACAGCCCTGG-3′
	CX26-F	5’-AGAGGACTTCGTCTGCAACA-3’	60
	CX26-R	5’-TGAACTTGCGAGTGGTTTCG-3’
	CX43-F	5’-ATCTCTCATGTGCGCTTCTG-3’	60
	CX43-R	5’-GTTTGGGCAACCTTGAGTTC-3’
	ITGB1-F	5’-ACCAACCGTAGCAAAGGAACA-3’	60
	ITGB1-R	5’-ATAAGGTAGTAGAGGTCAATGG-3’
	ITGB4-F	5’-ACGAGCTTAAGAGAGCCGAG-3’	60
	ITGB4-R	5’-TTGTGCACCAGGACAGTGCT-3’
	ITGA6-F	5’-GAGCTTTTGTGATGGGCGATT-3’	50
	ITGA6-R	5’-CTCTCCACCAACTTCATAAGGC-3’
	ELN-F	5′-GGCCATTCCTGGTGGAGTTCC-3′	60
	ELN-R	5′-AACTGGCTTAAGAGGTTTGCCTCCA-3′
	Vimentin-F	5′-GAAATTGCAGGAGGAGATGC-3′	60
	Vimentin-R	5′-GCAAAGATTCCACTTTGCGT-3′
	Keratin 5-F	5′-GCTGAGAAACATGCAGGACC-3′	60
	Keratin 5-R	5′-TGAACAAGGTGGAGCTGGAG-3′
	Fibronectin-F	5-CCATAAAGGGCAACCAAGAG-3	60
	Fibronectin-R	5-AAACCAATTCTTGGAGCAGG-3
	CLO1A1-F	5′-GTTGTGCGATGACGTGATCTGTGA-3′	60
	CLO1A1-R	5′-TTCTTGGTCGGTGGGTGACTCTG-3′
	COL3A1-F	5′-CCAGGAGCTAACGGTCTCAG-3′	60
	COL3A1-R	5′-CAGGGTTTCCATCTCTTCCA-3′
	COL4A1-F	5’-TGATACTGGAGAACCAGGACT-3′	60
	COL4A1-R	5’-TGCATCCTGGAATACCTGGG-3′
	MMP2-F	5′-ACCACAGCCAACTACGATGA-3′	60
	MMP2-R	5′-GTAAATGGGTGCCATCAGGG-3′
	MMP7-F	5’-GTATGGGACATTCCTCTGATCC-3′	60
	MMP7-R	5’-CCAATGAATGAATGAATGGATG-3′
	MMP9-F	5′-TTGACAGCGACAAGAAGTGG-3′	60
	MMP9-R	5′-GCCATTCACGTCGTCCTTAT-3′
	MMP14-F	5′-CCTTGGACTGTCAGGAATGAGG-3′	60
	MMP14-R	5′-TTCTCCGTGTCCATCCACTGGT-3′
	TIMP1-F	5’-AGACCTACACTGTTGGCTGTGAG-3′	60
	TIMP1-R	5’-GACTGGAAGCCCTTTTCAGAG-3′
	TIMP2-F	5’-ACAGGCGTTTTGCAATGCA-3′	60
	TIMP2-R	5’-GGGTTGCCATAAATGTCGTTTC-3′
Abbreviations: BS, bisulfite sequencing; MSP, methylation specific primer; UM, unmethylation; M, methylation;
L, long; S, short; ORF, open reading frame.
