# Supplementary material for: Fibulin 2 Is Hypermethylated and Suppresses Tumor Cell Proliferation through Inhibition of Cell Adhesion and Extracellular Matrix Genes in Non-Small Cell Lung Cancer
Source: Int J Mol Sci. 2021 Oct 31;22(21):11834. doi: 10.3390/ijms222111834 (PMC8584407; doi:10.3390/ijms222111834)
Supplement: Supplementary file 1 [file ijms-22-11834-s001.zip › Supplementary Table 2.xlsx]

## Sheet: Supplementary Table 2
Supplementary Table 2. Antibodies used for Western blot (WB) and immunohistochemistry (IHC)
Name	Host	Company	dilution
Fibulin 2: SAB2702003	Rabbit	Sigma-Aldrich, Merck, Darmstadt, Germany	1:200 (IHC)
Fibulin 2: NBP1-33479	Rabbit	Novus Biologicals, Wiesbaden Nordenstadt, Germany	1:1000 (WB)
Fibronectin (clone IST9): sc-59826	Mouse	Santa Cruz Biotechnology, Santa Cruz, CA USA	1:500 (IHC)
E-cadherin (clone NCH-38): GA059	Mouse	Dako North America, Inc., Carpinteria, CA USA	Ready to use (IHC)
Vimentin (clone V9): GA630	Mouse	Dako North America, Inc., Carpinteria, CA USA	Ready to use (IHC)
Cytokeratin (clone MNF116): M0821	Mouse	Dako North America, Inc., Carpinteria, CA USA	1:300 (IHC)
COL1A1: GTX112731	Rabbit	GeneTex, Alton Pkwy Irvine, CA USA	1:1000 (WB)
Vimentin: sc-6260	Mouse	Santa Cruz Biotechnology, Heidelberg, Europe	1:1000 (WB)
N-cadherin: sc-59987	Mouse	Santa Cruz Biotechnology, Heidelberg, Europe	1:1000 (WB)
Integrin β4: sc-514426	Mouse	Santa Cruz Biotechnology, Heidelberg, Europe	1:1000 (WB)
mTor: 2983s	Rabbit	Cell Signaling Technology, Danvers, MA USA	1:750 (WB)
p-mTor (Ser2448): 5536s	Rabbit	Cell Signaling Technology, Danvers, MA USA	1:750 (WB)
AKT: 9297s	Rabbit	Cell Signaling Technology, Danvers, MA USA	1:1000 (WB)
p-AKT (Thr308): 9275s	Rabbit	Cell Signaling Technology, Danvers, MA USA	1:1000 (WB)
p44/42 MAPK(ERK1/2): 4695s	Rabbit	Cell Signaling Technology, Danvers, MA USA	1:1000 (WB)
p-p44/42 MAPK (ERK1/2) (Thr202/Tyr204): 9101s	Rabbit	Cell Signaling Technology, Danvers, MA USA	1:1000 (WB)
β-actin: MAB1501R	Mouse	Milipore, Billerica, MA USA	1:1000 (WB)
CD63 (TS63): 10628D	Mouse	Life Technology corporation, Frederick, MD USA	1:500 (WB)
CD9 (MM2/57): AHS0902	Mouse	Life Technology corporation, Frederick, MD USA	1:300 (WB)
KPL HRP-Labeled antibody to mouse IgG (H+L)		SeraCare Life Sciences Inc., Milford, Mass USA	1:2000 (WB)
KPL HRP-Labeled antibody to Rabbit IgG (H+L)		SeraCare Life Sciences Inc., Milford, Mass USA	1:2000 (WB)
